# Supplementary material
Source: ML conference proceedings conference paper supplement (https://openaccess.thecvf.com/content/WACV2025/html/Khan_CAMS_Convolution_and_WACV_2025_paper.html)
Supplement: Supplementary file 1 [file Khan_CAMS_Convolution_and_WACV_2025_supplemental.pdf]

# Supplementary Material

## CAMs: Convolution and Attention-Free Mamba-based Cardiac Image Segmentation

| Block expansion factor (E) | SSM state expansion factor (D) | No. trainable parameters |
|----------------------------|--------------------------------|--------------------------|
| 1                          | 1                              | 4,512                    |
| 1                          | 2                              | 4,608                    |
| 2                          | 1                              | 8,896                    |
| 2                          | 2                              | 9,088                    |

Table 1. Effect of block expansion factor (E) and SSM state expansion factor (D) on parameters of the Non-Convolutional Mamba Block.

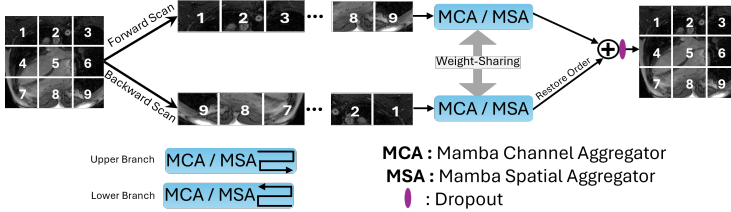

Figure 1. The proposed bidirectional scanning scheme augmented with weight-sharing strategy. For each pass, the features are processed by either MCA or MSA, followed by merging the scans using element-wise addition and dropout.
